# Supplementary material for: Identification of polarized macrophage subsets in zebrafish
Source: eLife journal article supplement (doi:10.7554/elife.07288), 2015-07-08
Supplement: supp [file elife-07288-supp-v1.zip]

Archive with 8 entries (8 files):
- elife_poa_e07288_Supplementary_File_1.pdf
- elife_poa_e07288_Video_3.mov
- elife_poa_e07288_Video_1.mov
- elife_poa_e07288_Figure_4_figure_supplement_1.pdf
- elife_poa_e07288_Video_5.mov
- elife_poa_e07288_Video_4.mov
- elife_poa_e07288_Video_2.mov
- elife_poa_e07288_Figure_2_figure_supplement_1.pdf
