# Supplementary material for: Identification of polarized macrophage subsets in zebrafish
Source: eLife journal article supplement (doi:10.7554/elife.07288), 2015-07-08
Supplement: supp [file elife-07288-supp-v1.zip › elife_poa_e07288_Supplementary_File_1.pdf]

**Supplementary file 1: Genes, accession numbers and sequences of the primers.**

| zebrafish primer |                    |             |                                 |         |
|------------------|--------------------|-------------|---------------------------------|---------|
| Gene             | Accession          | Name primer | Nucleotide sequence (5'→3')     | Use     |
| tnfa promoter    | Gene ID: 405785    | zTNFaP4     | CCCGCATGCTCCACGTCTCC            | cloning |
|                  |                    | zTNFaE11N   | TTATAGCGGCCGCCCCGACTCTCAAGCTTCA |         |
| ccr2             | ENSDARG00000079829 | CCR2.5      | TGGCAACGCAAAGGCTTTTCAGTGA       | qPCR    |
|                  |                    | CCR2.3      | TCAGCTAGGGCTAGGTTGAAGAG         |         |
| il6              | NM_001261449.1     | IL6.5       | TGAAGACACTCAGAGACGAGCAGTT       | qPCR    |
|                  |                    | IL6.3       | AGGTTTGAGGAGAGGAGTGCTGAT        |         |
| il10             | NM_001020785       | IL10.52     | TCAGAGCAGGAGAGTCTCGAATGCA       | qPCR    |
|                  |                    | IL10.32     | CGATTGGGGTTGTGGAGTGCTT          |         |
| tgfb1            | ENSDARG00000041502 | TGFb1a 5.3  | CAACCGCTGGCTCTCATTTGA           | qPCR    |
|                  |                    | TGFb1a 3.3  | ACAGTCGCAGTATAACCTCAGCT         |         |
| tnfb             | NM_001024447.1     | zTNFap.51   | CGAAGAAGGTCAGAAACCCA            | qPCR    |
|                  |                    | zTNFap.3    | GTTGGAATGCCTGATCCACA            |         |
| tnfa             | NM_212859          | zTNFa.54    | TTCACGCTCCATAAGACCCA            | qPCR    |
|                  |                    | zTNFa.34    | CCGTAGGATTCAGAAAAGCG            |         |
|                  |                    | TNFa .55    | GGCGTTTTTGGATGTTGAAG            | probe   |
|                  |                    | TNFa. 38    | TGCCCAGTCTGTCTCCTTCT            |         |
| mpeg1            | NM_212737.1        | zmpeg1.5    | GTGAAAGAGGGTTCTGTTACA           | qPCR    |
|                  |                    | zmpeg1.3    | GCCGTAATCAAGTACGAGTT            |         |
| il1b             | NM_212844.2        | zIL1b.5     | TGGACTTCGCAGCACAAAATG           | qPCR    |
|                  |                    | zIL1b.3     | GTTCACTTCACGCTCTTGGATG          |         |
| ef1a             | ENSDARG00000020850 | zEF1a.5     | TTCTGTTACCTGGCAAAGGG            | qPCR    |
|                  |                    | zEF1a.3     | TTCAGTTTGTCCAACACCCA            |         |
| arg1             | NM_001045197.1     | ARG1 5.3    | ACGGCCAGCCGATGTCTTAC            | qPCR    |
|                  |                    | ARG1 3.3    | TCCACGTCTCGGAGTCCAAT            |         |
