# Supplementary figures and images for: Identification of polarized macrophage subsets in zebrafish
Source: eLife journal article supplement (doi:10.7554/elife.07288), 2015-07-08

**Figure 2- figure supplement 1**

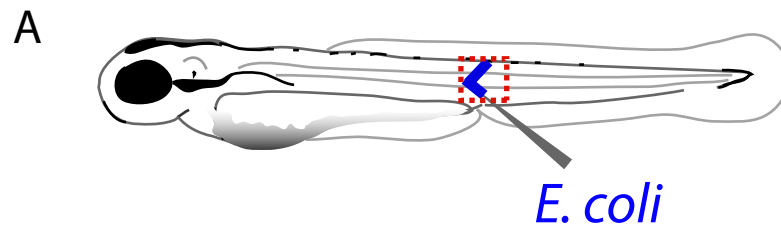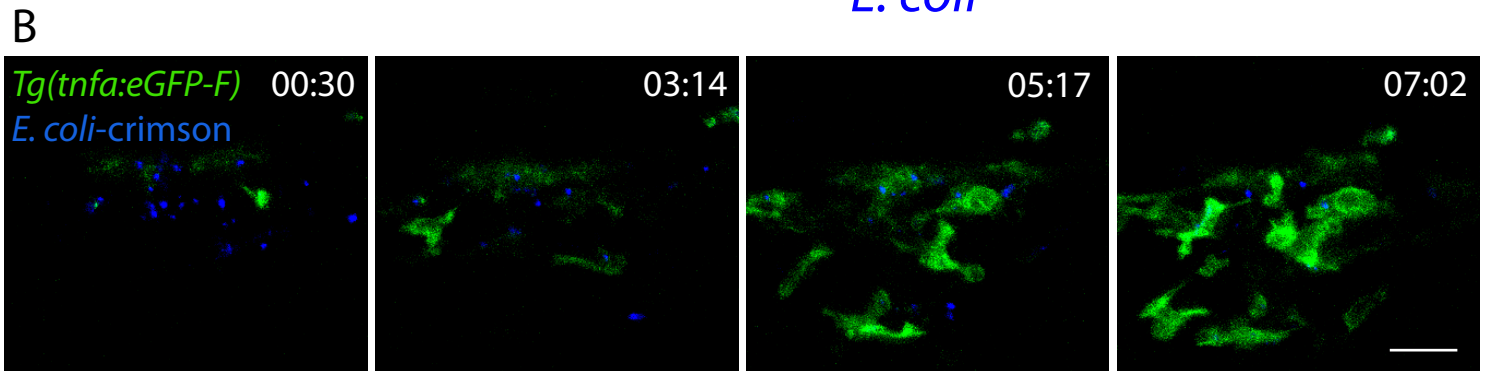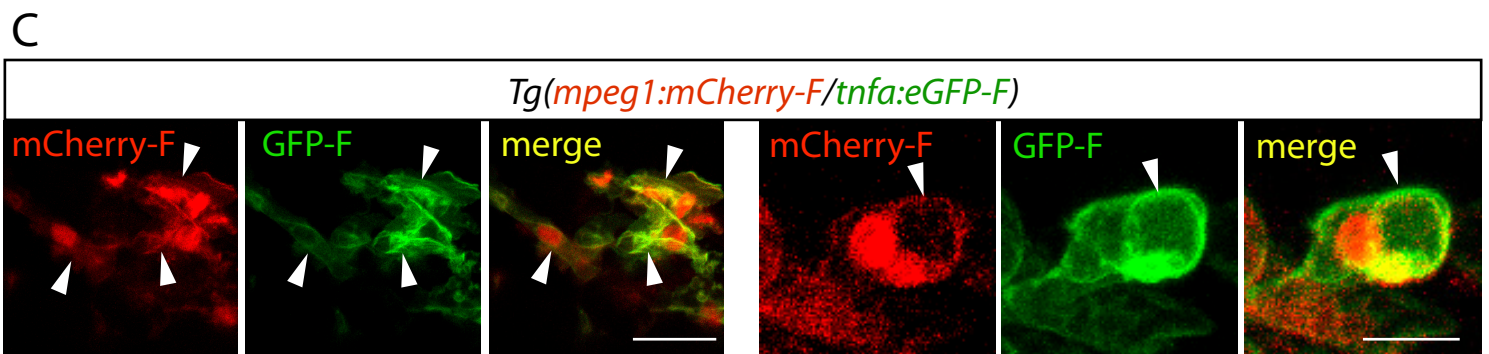

Supplement: supp [file elife-07288-supp-v1.zip]

Figure 4- Figure supplement 1

A

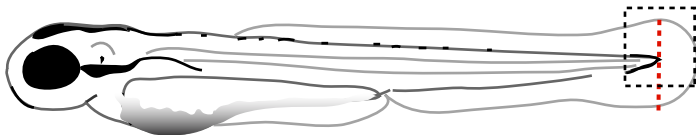

B

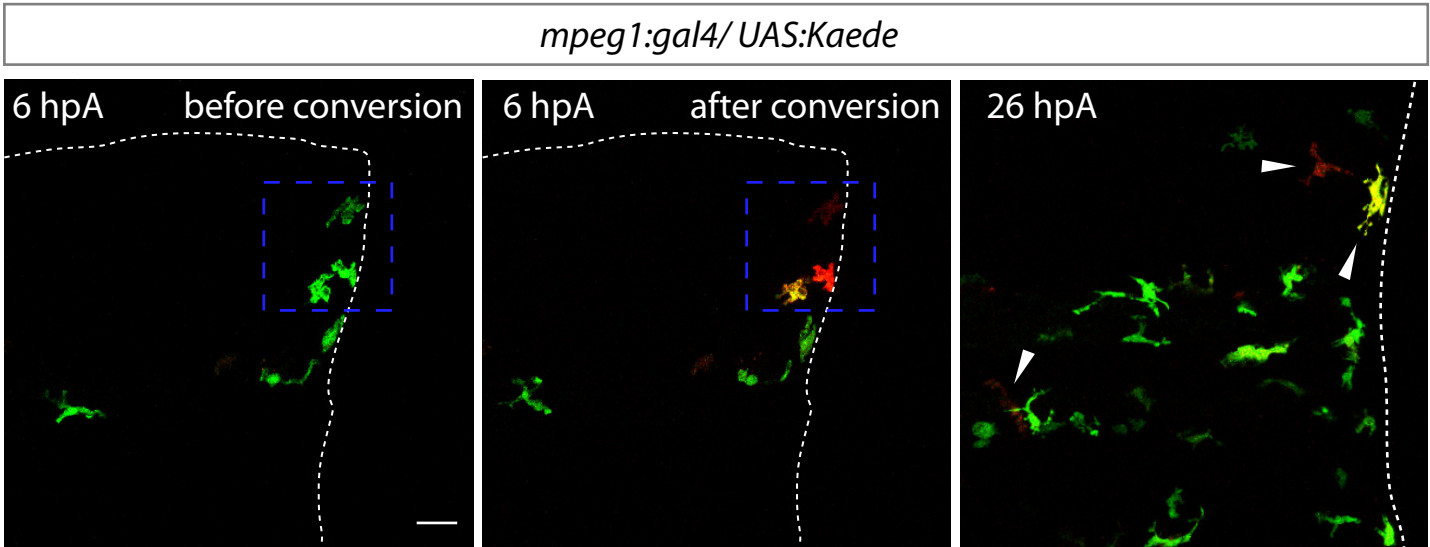

Supplement: supp [file elife-07288-supp-v1.zip › elife_poa_e07288_Figure_4_figure_supplement_1.pdf]
